# Supplementary material for: Dynamic changes in host immune system and gut microbiota are associated with the production of SARS-CoV-2 antibodies
Source: HighWire-hosted journal article supplement (doi:10.1136/gutjnl-2022-327561), 2022-10-07
Supplement: gutjnl-2022-327561supp001_data_supplement.pdf [file gutjnl-2022-327561supp001_data_supplement.pdf]

Supplementary Table S1 The levels of SARS-CoV-2 antibodies were measured in different time points during the SARS-CoV-2 vaccination process from the healthy volunteers using ELISA method.

| Sample ID          | The measurement of antibodies before vaccination (pg/ml) |     |             | The measurement of antibodies at 2 weeks after first dose (pg/ml) |             |             | The measurement of antibodies at 1 week after second dose (pg/ml) |             |             | The measurement of antibodies at 2 weeks after second dose (pg/ml) |             |             |
|--------------------|----------------------------------------------------------|-----|-------------|-------------------------------------------------------------------|-------------|-------------|-------------------------------------------------------------------|-------------|-------------|--------------------------------------------------------------------|-------------|-------------|
|                    | IgA                                                      | IgG | IgM         | IgA                                                               | IgG         | IgM         | IgA                                                               | IgG         | IgM         | IgA                                                                | IgG         | IgM         |
| F01                | 0                                                        | 0   | 5.790462    | 3.115225                                                          | 69.69946    | 21.88886    | 9.895591                                                          | 2143.419    | 45.06539    | 11.53869                                                           | 2349.821    | 61.44432    |
| F02                | 0                                                        | 0   | 0           | 8.183167                                                          | 216.1954    | 21.79543    | 10.05505                                                          | 1589.309    | 28.90224    | 63.45216                                                           | 2044.093    | 28.95619    |
| F03                | 0                                                        | 0   | 0           | 1.513727                                                          | 82.36792    | 13.26068    | 52.46353                                                          | 1652.449    | 25.93505    | 39.4713                                                            | 1566.937    | 21.03647    |
| F04                | 0                                                        | 0   | 0           | 0                                                                 | 218.9582    | 21.63666    | 8.065308                                                          | 2182.503    | 35.54106    | 14.90807                                                           | 2303.729    | 43.2342     |
| F05                | 0                                                        | 0   | 0           | 12.53009                                                          | 167.8801    | 10.4877     | 162.8074                                                          | 1997.462    | 16.58028    | 115.1646                                                           | 2020.036    | 12.70673    |
| F06                | 0                                                        | 0   | 0           | 0                                                                 | 0           | 0           | 0                                                                 | 1532.166    | 19.38563    | 0                                                                  | 1534.457    | 29.06409    |
| F07                | 0                                                        | 0   | 0           | 0.258874                                                          | 0           | 7.380233    | 5.798253                                                          | 247.058     | 0.395555    | 0                                                                  | 526.5054    | 7.732628    |
| F08                | 0                                                        | 0   | 0           | 0                                                                 | 218.9582    | 23.40311    | 11.99626                                                          | 2182.503    | 2.790893    | 50.51539                                                           | 2303.729    | 9.685585    |
| F09                | 0                                                        | 0   | 0           | 8.210899                                                          | 375.0903    | 54.45619    | 25.73031                                                          | 2040.926    | 62.49094    | 74.54479                                                           | 1819.43     | 46.24148    |
| F10                | 0                                                        | 0   | 20.81355    | 52.15849                                                          | 333.5135    | 39.32887    | 123.8168                                                          | 1778.19     | 55.82283    | 58.95272                                                           | 1684.861    | 35.23587    |
| F11                | 0                                                        | 0   | 0           | 2.435801                                                          | 0           | 0           | 11.33763                                                          | 1343.621    | 0.07186     | 21.7231                                                            | 1532.57     | 1.916918    |
| F12                | 0                                                        | 0   | 0           | 3.905574                                                          | 292.6779    | 117.814     | 154.689                                                           | 2283.513    | 85.75378    | 72.70757                                                           | 2200.023    | 50.50345    |
| F13                | 0                                                        | 0   | 0           | 53.10136                                                          | 0           | 54.45619    | 63.52149                                                          | 1287.961    | 62.49094    | 89.15932                                                           | 1381.627    | 46.24148    |
| F14                | 0                                                        | 0   | 5.790462    | 3.115225                                                          | 69.69946    | 21.88886    | 9.895591                                                          | 2143.419    | 45.06539    | 11.53869                                                           | 2349.821    | 61.44432    |
| F15                | 0                                                        | 0   | 0           | 8.183167                                                          | 216.1954    | 21.79543    | 10.05505                                                          | 1589.309    | 28.90224    | 63.45216                                                           | 2044.093    | 28.95619    |
| M01                | 0                                                        | 0   | 0           | 29.72366                                                          | 189.1065    | 0           | 43.23586                                                          | 813.9043    | 5.488347    | 169.3867                                                           | 2152.718    | 40.14523    |
| M02                | 137.2597                                                 | 0   | 23.36707    | 90.22005                                                          | 0           | 5.89836     | 109.6945                                                          | 865.3868    | 21.55438    | 94.17873                                                           | 1270.508    | 46.24148    |
| M03                | 0                                                        | 0   | 0           | 38.05006                                                          | 0           | 0           | 77.3942                                                           | 668.2844    | 0           | 110.6513                                                           | 872.1253    | 0           |
| M04                | 0                                                        | 0   | 0           | 0                                                                 | 0           | 0           | 96.32793                                                          | 566.1954    | 2.851008    | 0                                                                  | 1075.899    | 18.72745    |
| M05                | 0                                                        | 0   | 0           | 2.934969                                                          | 63.9717     | 18.94325    | 33.97352                                                          | 1354.605    | 28.31959    | 98.39393                                                           | 1928.662    | 44.0943     |
| M06                | 0                                                        | 0   | 0           | 13.07779                                                          | 0           | 0           | 45.80796                                                          | 1063.567    | 0           | 28.75305                                                           | 1077.247    | 0           |
| M07                | 0                                                        | 0   | 0           | 0                                                                 | 0           | 0           | 0                                                                 | 0           | 0           | 0                                                                  | 534.4569    | 0           |
| M08                | 0                                                        | 0   | 0           | 5.812119                                                          | 0           | 0           | 21.39725                                                          | 566.1954    | 3.913034    | 26.05616                                                           | 1075.899    | 10.5164     |
| M09                | 0                                                        | 0   | 0           | 5.701192                                                          | 0           | 0           | 46.96575                                                          | 1380.212    | 13.72098    | 12.19038                                                           | 1221.317    | 12.83621    |
| M10                | 0                                                        | 0   | 0           | 0                                                                 | 0           | 0           | 25.03009                                                          | 0           | 0           | 0                                                                  | 0           | 0           |
| M11                | 0                                                        | 0   | 0           | 45.17707                                                          | 0           | 0           | 114.2148                                                          | 249.2143    | 0           | 184.4866                                                           | 729.6051    | 0           |
| M12                | 0                                                        | 0   | 0           | 44.01927                                                          | 0           | 0           | 104.8692                                                          | 1503.055    | 15.68472    | 98.8099                                                            | 1555.818    | 10.68904    |
| M13                | 0                                                        | 0   | 0           | 0                                                                 | 0           | 0           | 12.28744                                                          | 1172.125    | 31.30837    | 4.799917                                                           | 1402.179    | 30.36966    |
| M14                | 0                                                        | 0   | 0           | 0                                                                 | 0           | 0           | 0                                                                 | 1249.282    | 13.72098    | 0                                                                  | 1249.282    | 13.72098    |
| M15                | 0                                                        | 0   | 0           | 0                                                                 | 0           | 0           | 6.699529                                                          | 1057.705    | 0           | 6.914448                                                           | 1322.53     | 0           |
| Mean               | 4.575323333                                              | 0   | 1.858718133 | 14.38092597                                                       | 83.810468   | 15.1477941  | 46.60084307                                                       | 1283.45132  | 21.7251829  | 50.72498917                                                        | 1504.332623 | 23.72468903 |
| Standard deviation | 24.6388702                                               | 0   | 5.60546677  | 21.93383041                                                       | 115.5800836 | 24.58475213 | 47.88433717                                                       | 664.0600361 | 22.63510932 | 50.48868568                                                        | 598.5702092 | 19.52003028 |
