# Supplementary material for: Dynamic changes in host immune system and gut microbiota are associated with the production of SARS-CoV-2 antibodies
Source: HighWire-hosted journal article supplement (doi:10.1136/gutjnl-2022-327561), 2022-10-07
Supplement: gutjnl-2022-327561supp002_data_supplement.pdf [file gutjnl-2022-327561supp002_data_supplement.pdf]

Supplementary Table S2 The levels of cytokines were measured in different time points during the SARS-CoV-2 vaccination process from the healthy volunteers using ELISA method.

| Sample ID          | The measurement of antibodies before vaccination (pg/ml) |             |             | The measurement of antibodies at 2 weeks after first dose (pg/ml) |             |             | The measurement of antibodies at 1 week after second dose (pg/ml) |             |             | The measurement of antibodies at 2 weeks after second dose (pg/ml) |             |             |
|--------------------|----------------------------------------------------------|-------------|-------------|-------------------------------------------------------------------|-------------|-------------|-------------------------------------------------------------------|-------------|-------------|--------------------------------------------------------------------|-------------|-------------|
|                    | IFN- $\gamma$                                            | IL-2        | IL-4        | IFN- $\gamma$                                                     | IL-2        | IL-4        | IFN- $\gamma$                                                     | IL-2        | IL-4        | IFN- $\gamma$                                                      | IL-2        | IL-4        |
| F01                | 0                                                        | 0           | 5.30952381  | 1.563830234                                                       | 0           | 1.845238095 | 2.12103855                                                        | 0           | 7.55952381  | 0.16977455                                                         | 1.256704981 | 2.595238095 |
| F02                | 0.71778095                                               | 0           | 8.55952381  | 1.899606059                                                       | 0           | 3.202380952 | 1.380776684                                                       | 0           | 11.5952381  | 0.573108359                                                        | 0           | 9.202380952 |
| F03                | 0                                                        | 0           | 0           | 0.329546159                                                       | 0           | 6.666666667 | 0.923442059                                                       | 0           | 6.380952381 | 0.436089659                                                        | 0.233716475 | 0.952380952 |
| F04                | 0                                                        | 0           | 2.738095238 | 0.010055309                                                       | 0           | 2.488095238 | 1.091081784                                                       | 0           | 8.916666667 | 0                                                                  | 7.848659004 | 1.273809524 |
| F05                | 0                                                        | 0           | 0           | 0                                                                 | 0           | 2.05952381  | 0.6264038                                                         | 0           | 9.273809524 | 1.007254738                                                        | 0           | 4.130952381 |
| F06                | 0                                                        | 0           | 10.98809524 | 0                                                                 | 0           | 7.845238095 | 0.740627909                                                       | 0           | 22.23809524 | 0.04807895                                                         | 5.01532567  | 19.41666667 |
| F07                | 35.36339925                                              | 0.003831418 | 8.988095238 | 41.1621525                                                        | 0           | 12.8452381  | 55.59690017                                                       | 0           | 13.27380952 | 55.66326781                                                        | 0           | 7.130952381 |
| F08                | 26.66961361                                              | 0           | 20.52380952 | 55.66326781                                                       | 0           | 7.130952381 | 48.80945445                                                       | 0           | 23.05952381 | 72.1957744                                                         | 0           | 18.02380952 |
| F09                | 28.56347588                                              | 2.95210728  | 1.773809524 | 48.91852025                                                       | 1.739463602 | 3.80952381  | 50.73268094                                                       | 3.27394636  | 16.02380952 | 69.2889882                                                         | 13.14176245 | 3.130952381 |
| F10                | 19.2487545                                               | 3.762452107 | 2.380952381 | 49.34411681                                                       | 0.337164751 | 1.05952381  | 70.35860913                                                       | 1.825670498 | 15.63095238 | 52.4438621                                                         | 1.314176245 | 0.880952381 |
| F11                | 23.62786936                                              | 0.699233716 | 6.880952381 | 48.79854925                                                       | 0           | 3.773809524 | 45.97171826                                                       | 2.394636015 | 9.095238095 | 56.31636444                                                        | 3.963601533 | 9.05952381  |
| F12                | 18.36213757                                              | 1.986590038 | 0           | 28.34452878                                                       | 0           | 2.880952381 | 37.33770025                                                       | 0.164750958 | 0           | 36.44500463                                                        | 9.601532567 | 0           |
| F13                | 26.815                                                   | 0           | 7.952380952 | 19.20794882                                                       | 0           | 1.202380952 | 40.16555505                                                       | 0           | 3.488095238 | 30.12013815                                                        | 5.095785441 | 1.630952381 |
| F14                | 16.75682023                                              | 2.285440613 | 11.91666667 | 34.98227997                                                       | 0           | 0           | 35.36339925                                                       | 0           | 16.77380952 | 32.11323122                                                        | 0           | 15.66666667 |
| F15                | 19.72852226                                              | 0           | 0.773809524 | 36.99741679                                                       | 0           | 1.130952381 | 63.08627129                                                       | 0           | 0.952380952 | 54.83432213                                                        | 0           | 0           |
| M01                | 0.086105559                                              | 1.03256705  | 9.238095238 | 0.740627909                                                       | 0           | 1.166666667 | 3.444072809                                                       | 1.049808429 | 15.66666667 | 1.007254738                                                        | 6.69348659  | 10.95238095 |
| M02                | 0.177381534                                              | 16.28544061 | 0           | 1.624863284                                                       | 0           | 0           | 2.037035159                                                       | 2.567049808 | 4.666666667 | 0.146954309                                                        | 10.89463602 | 1.345238095 |
| M03                | 0                                                        | 2.181992337 | 0.666666667 | 0.299109434                                                       | 0           | 0           | 0.47414655                                                        | 3.69348659  | 3.630952381 | 0                                                                  | 10.91762452 | 5.416666667 |
| M04                | 1.518060434                                              | 3.739463602 | 3.238095238 | 1.731689409                                                       | 2.561302682 | 5.916666667 | 2.747698438                                                       | 1.727969349 | 32.88095238 | 1.243531409                                                        | 7.888888889 | 29.52380952 |
| M05                | 0                                                        | 0.331417625 | 0           | 0.177381534                                                       | 0           | 15.30952381 | 1.14443375                                                        | 0           | 2.880952381 | 0.35237495                                                         | 12.74521073 | 0           |
| M06                | 0                                                        | 0           | 0           | 0.0176598                                                         | 0           | 1.273809524 | 0.512206409                                                       | 0           | 6.130952381 | 0.580721637                                                        | 0           | 0           |
| M07                | 0                                                        | 0.078544061 | 0           | 0.847261184                                                       | 0           | 0           | 0.847261184                                                       | 0           | 0           | 0                                                                  | 0           | 0           |
| M08                | 47.94050518                                              | 42.44636015 | 0           | 34.20473375                                                       | 21.13601533 | 0           | 33.61222628                                                       | 14.56130268 | 0           | 53.00380941                                                        | 32.17624521 | 1.202380952 |
| M09                | 0                                                        | 1.388888889 | 0           | 0.41325695                                                        | 0           | 10.30952381 | 0                                                                 | 0           | 7.095238095 | 0                                                                  | 1.572796935 | 3.166666667 |
| M10                | 0                                                        | 0           | 43.77380952 | 0                                                                 | 0           | 29.66666667 | 0.154560938                                                       | 0           | 57.80952381 | 0                                                                  | 2.647509579 | 2.702380952 |
| M11                | 0                                                        | 1.090038314 | 0           | 0.367594737                                                       | 0           | 5.238095238 | 0.192595859                                                       | 0           | 6.916666667 | 0                                                                  | 0           | 0.130952381 |
| M12                | 0.53504375                                               | 0           | 2.845238095 | 1.281651238                                                       | 0           | 4.773809524 | 0.771092184                                                       | 0.130268199 | 3.666666667 | 0.314327559                                                        | 0.584291188 | 5.416666667 |
| M13                | 1.601975                                                 | 0           | 6.738095238 | 0.314327559                                                       | 0.584291188 | 5.416666667 | 2.166864638                                                       | 0           | 0           | 0.0176598                                                          | 0           | 10.70238095 |
| M14                | 0.672090238                                              | 0           | 3.845238095 | 1.960680909                                                       | 0           | 11.80952381 | 2.51834                                                           | 0           | 31.70238095 | 0                                                                  | 14.07279693 | 22.02380952 |
| M15                | 5.777552109                                              | 1.03256705  | 9.238095238 | 2.533627238                                                       | 0           | 1.166666667 | 1.914874059                                                       | 1.049808429 | 15.66666667 | 0.83964375                                                         | 6.69348659  | 10.95238095 |
| Mean               | 9.138736247                                              | 2.709897829 | 5.612301587 | 13.79120946                                                       | 0.878607918 | 4.999603175 | 16.89476893                                                       | 1.081289911 | 11.76587302 | 17.30538456                                                        | 5.145274585 | 6.554365079 |
| Standard deviation | 13.24771576                                              | 7.965012354 | 8.592282657 | 19.37038178                                                       | 3.801813905 | 6.099503626 | 23.06971263                                                       | 2.721566662 | 12.16137412 | 25.25703494                                                        | 6.825979293 | 7.541293906 |
