# Supplementary material for: Dynamic changes in host immune system and gut microbiota are associated with the production of SARS-CoV-2 antibodies
Source: HighWire-hosted journal article supplement (doi:10.1136/gutjnl-2022-327561), 2022-10-07
Supplement: gutjnl-2022-327561supp007_data_supplement.pdf [file gutjnl-2022-327561supp007_data_supplement.pdf]

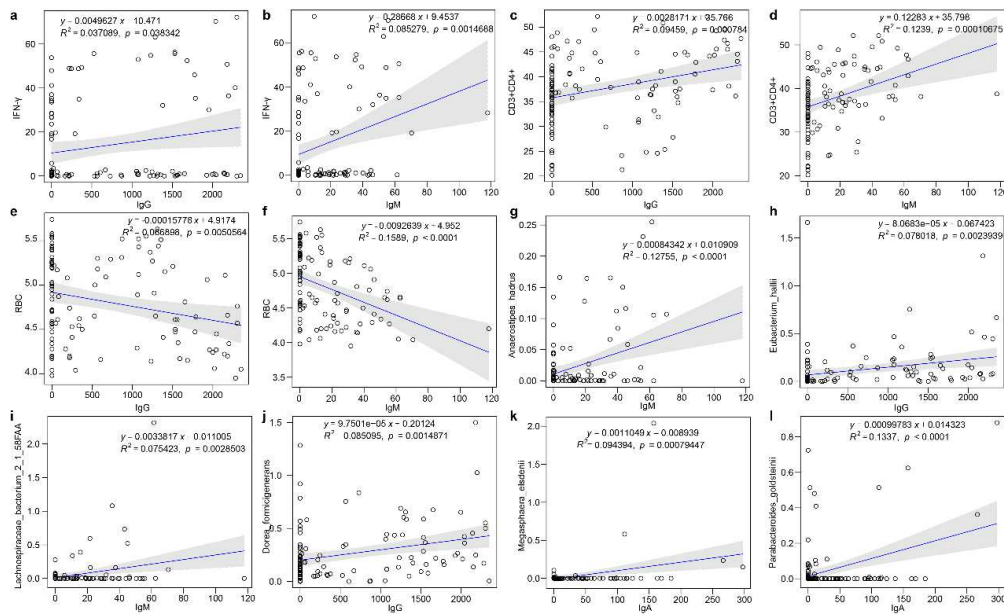

**Supplementary Figure S2. Correlations between the concentrations of antibodies against SARS-CoV-2 and the features of cytokines, indicators obtained from routine blood tests, lymphocytes, and the gut microbiota. (a)** A positive correlation was found between IFN- $\gamma$  and IgG. **(b)** A positive correlation was found between IFN- $\gamma$  and IgM. Positive correlations were detected between CD3CD4 and **(c)** IgG and between CD3CD4 and **(d)** IgM. Negative correlations were found **(e)** between RBCs and IgG and **(f)** between RBCs and IgM. The following correlations were also found between SARS-CoV-2 antibodies and gut microbes: **(g)** *Prevotella copri* and IgG, **(h)** *Eubacterium hallii* and IgG, **(i)** *Clostridium leptum* and IgG, **(j)** *Dorea formicigenerans* and IgG, **(k)** *Mgeasphaera elsdenii* and IgA, **(l)** *Parabacteroides goldsteinii* and IgA, **(m)** *Lactobacillus ruminis* and IgA, **(n)** *Ruminococcus torques* and IgM, **(o)** *Anaerostipe shadrus* and IgM, **(p)** *Lachnospiraceae bacterium 2\_1\_58FAA* and IgM.
